# Supplementary material
Source: MDPI journal article supplement (https://www.mdpi.com/2073-4352/9/9/472)
Supplement: s1 [file s1]

## Supplementary Materials

### Comparison of *Candida albicans* Fatty Acid Amide Hydrolase Structure with Homologous Amidase Signature Family Enzymes

Cho-Ah Min<sup>1,5</sup>, Ji-Sook Yun<sup>1,5</sup>, Eun Hwa Choi<sup>2</sup>, Ui Wook Hwang<sup>1,2</sup>, Dong-Hyung Cho<sup>3</sup>, Je-Hyun Yoon<sup>4</sup>, and Jeong Ho Chang<sup>1,2\*</sup>

<sup>1</sup>Department of Biology Education, Kyungpook National University, Daegu 41566, South Korea

<sup>2</sup>Research Institute for Phylogenomics and Evolution, Kyungpook National University, Daegu 41566, South Korea

<sup>3</sup>School of Life Sciences, Kyungpook National University, Daegu 41566, South Korea

<sup>4</sup>Department of Biochemistry and Molecular Biology, Medical University of South Carolina, Charleston, SC 29425, USA

<sup>5</sup>These authors contributed equally to this work

Key words: Fatty acid amide hydrolase, AS family, FAAH inhibitor, MAE2, PAM

---

\*Correspondence information:

Jeong Ho Chang

Phone: +82-53-950-5913; Fax: +82-53-950-6809; E-mail: jhcbio@knu.ac.kr

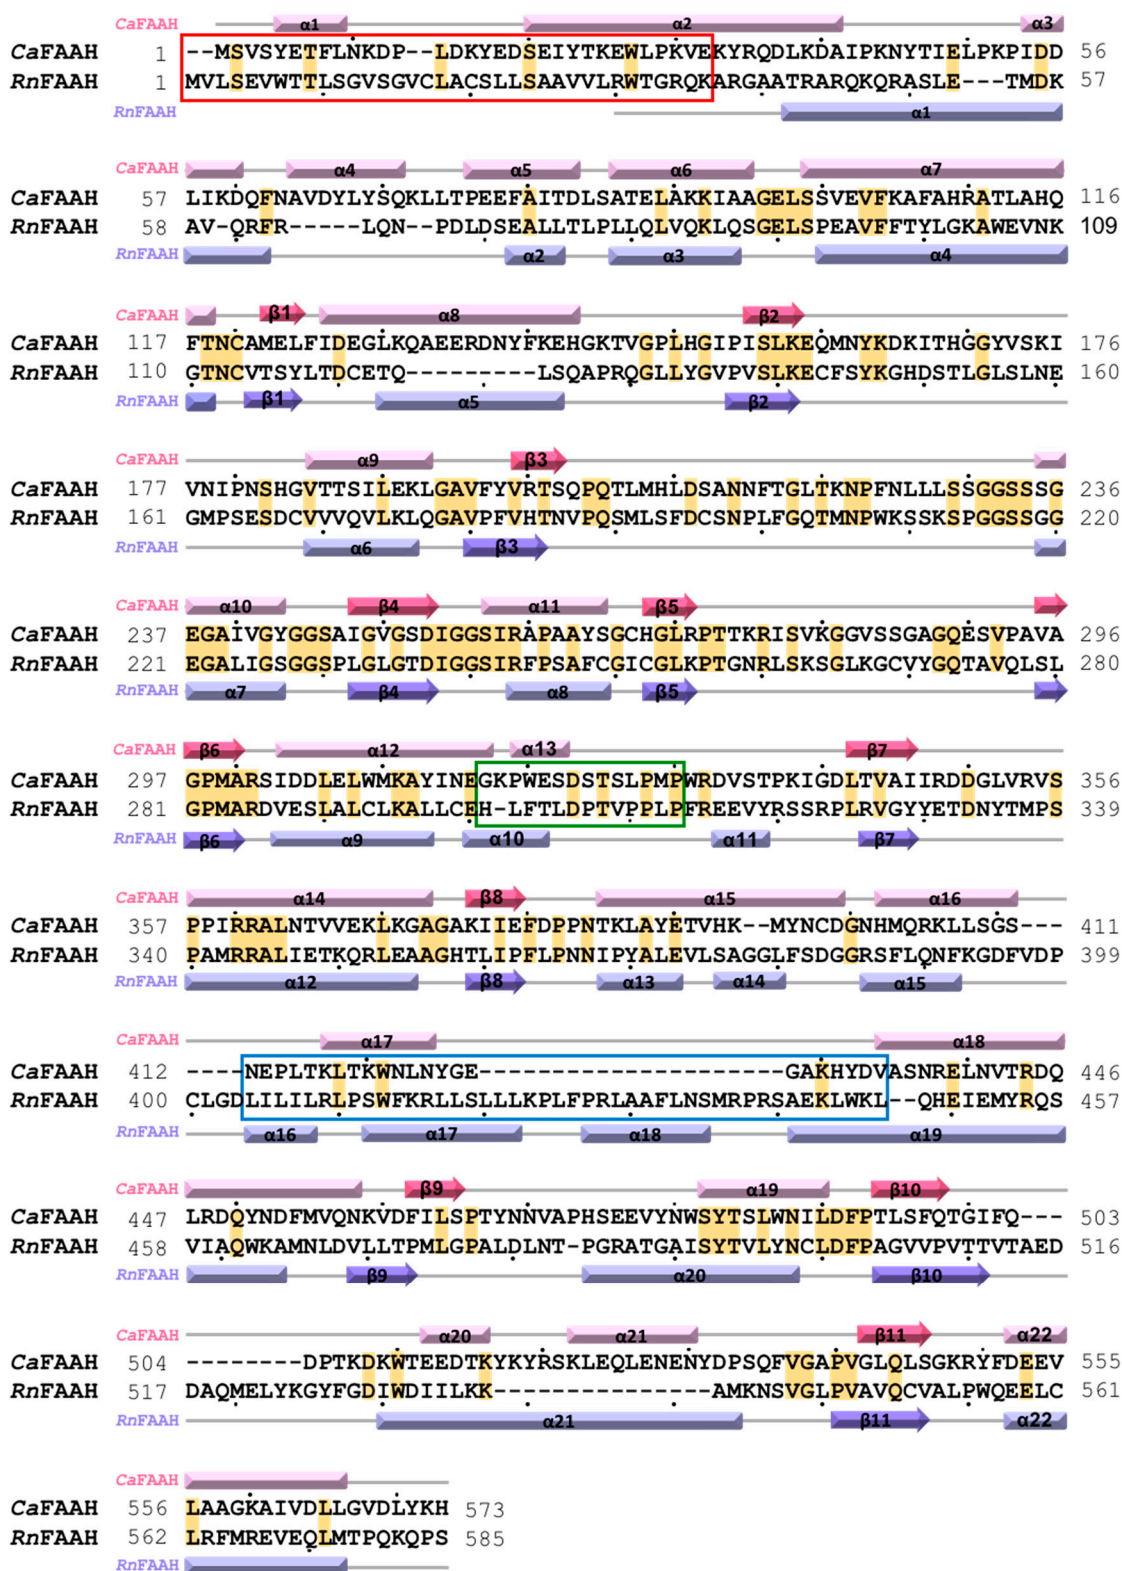

**Supplemental Figure S1. Structure-based sequence alignment of CaFAAH with RnFAAH.** Identical residues between CaFAAH and RnFAAH are highlighted in yellow. The red box indicates the monotopic transmembrane domain of RnFAAH. The green box shows the oligomerization domain and the blue box represents the hydrophobic cap in RnFAAH. The secondary structure elements in both FAAHs are shown in the vicinity of their sequences. Black dots, either above or below the CaFAAH and RnFAAH sequences, indicate every tenth residue.

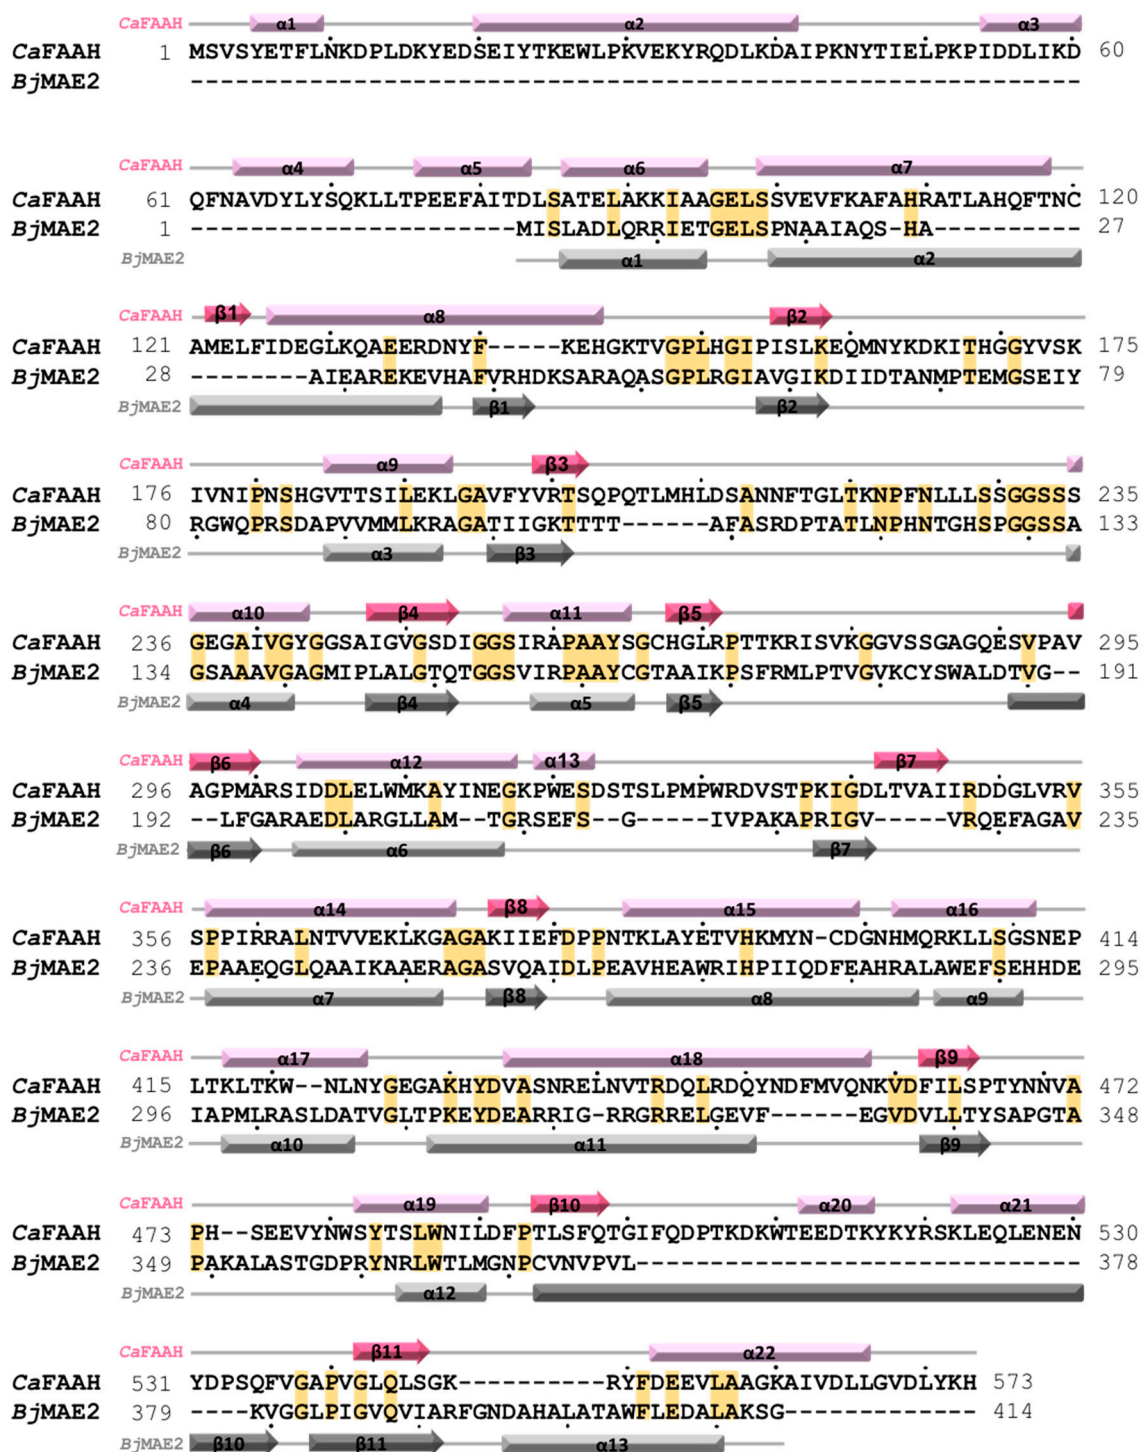

**Supplemental Figure S2. Structure-based sequence alignment of *CaFAAH* with *BjMAE2*.** Identical residues between *CaFAAH* and *BjMAE2* are highlighted in yellow. The secondary structure elements in *CaFAAH* and *BjMAE2* are shown in the vicinity of the sequences. Black dots, either above or below the sequence, indicate every tenth residue in *CaFAAH* and *BjMAE2*.

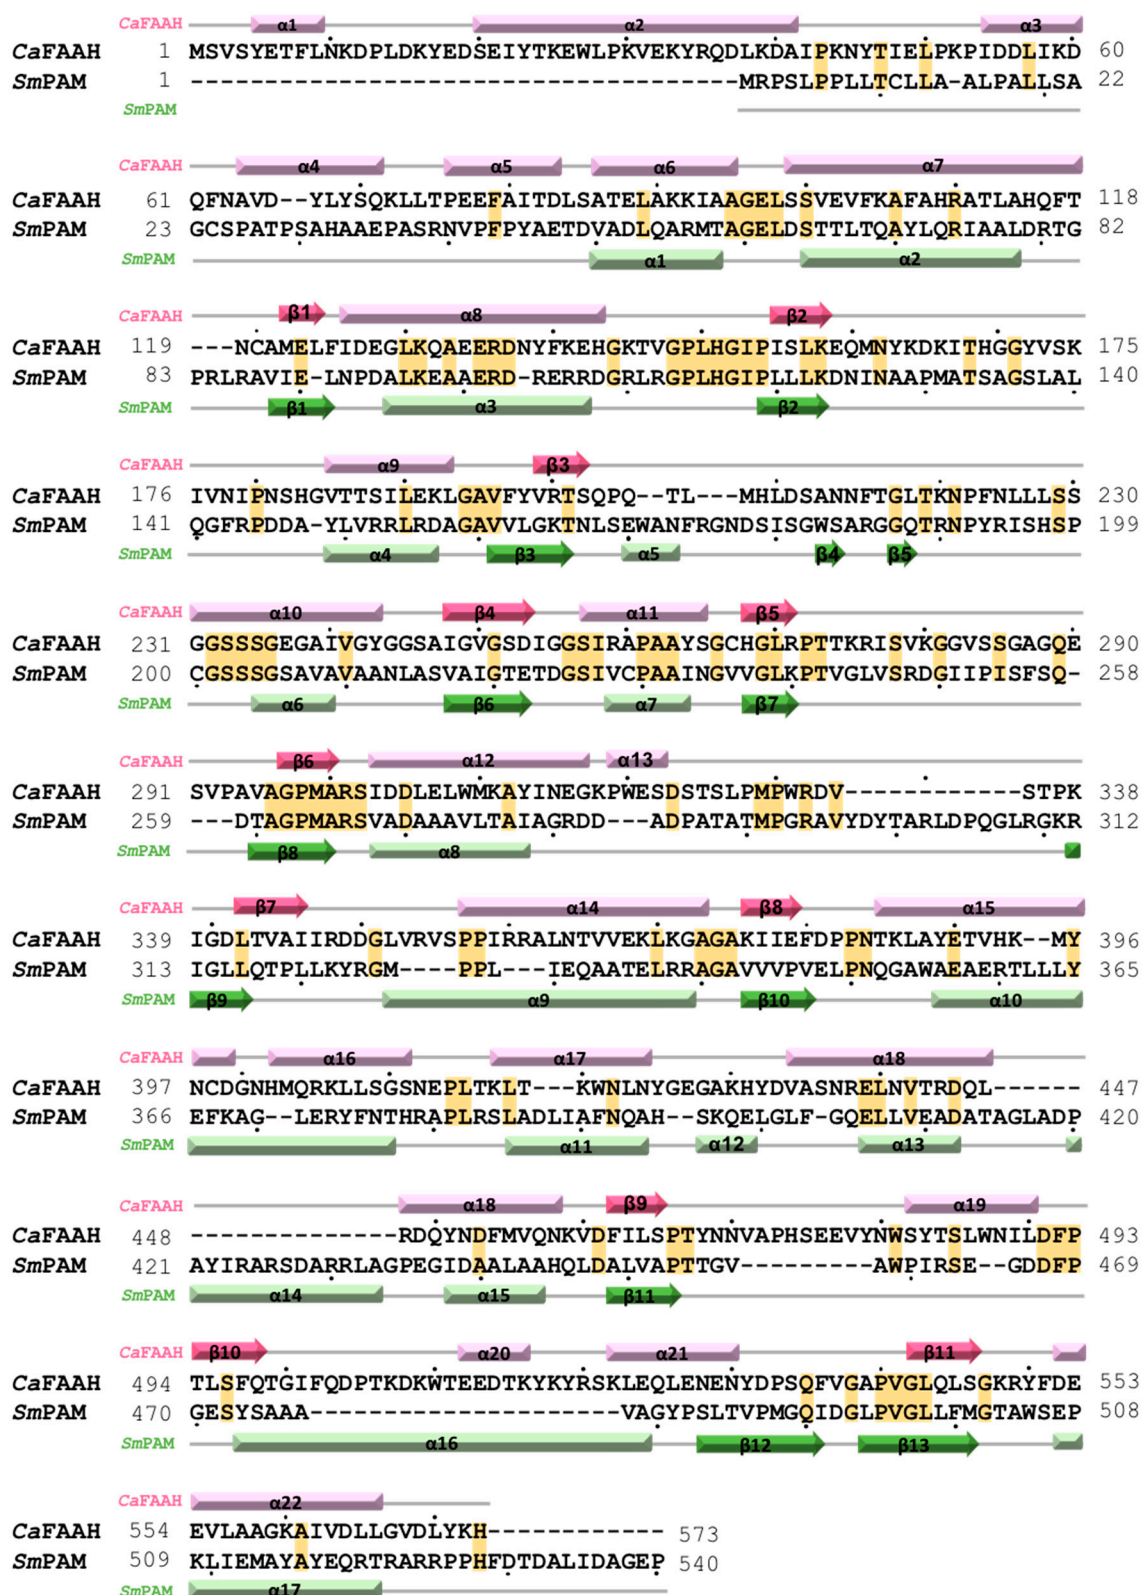

**Supplemental Figure S3. Structure-based sequence alignment of *CaFAAH* with *SmPAM*.** Identical residues within *CaFAAH* and *SmPAM* are highlighted in yellow. The secondary structure elements in *CaFAAH* and *SmPAM* are shown in the vicinity of the sequences. Black dots, either above or below the sequences, indicate every tenth residue in *CaFAAH* and *SmPAM*.
